# Supplementary material for: Thousands of high-quality sequencing samples fail to show meaningful correlation between 5S and 45S ribosomal DNA arrays in humans
Source: PubMed Central journal article supplement (PMC7801704; doi:10.1038/s41598-020-80049-y), 2021-01-11
Supplement: 41598_2020_80049_MOESM4_ESM.pdf [file 41598_2020_80049_MOESM4_ESM.pdf]

Thousands of high-quality sequencing samples fail to show meaningful correlation between 5S and 45S ribosomal DNA arrays in humans

Ashley N. Hall<sup>1,2</sup>, Tychele N. Turner<sup>3\*</sup>, Christine Queitsch<sup>1\*</sup>

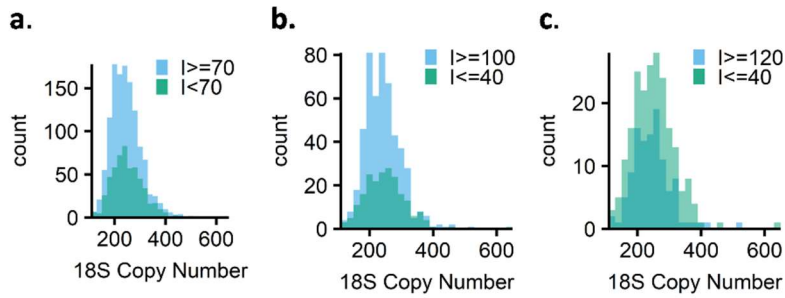

**Figure S1: Additional comparisons of rDNA copy number of probands with differing IQ.** **a:** Comparison of rDNA copy number in probands at the cutoff of pathological IQ ( $I < 70$ ,  $n = 548$  compared to  $I \geq 70$ ,  $n = 1,244$ ). Welch Two Sample t-test p-value: 0.03. **b:** Comparison of rDNA copy number of probands with  $I \leq 40$  ( $n = 210$ ) and  $I \geq 100$  ( $n = 500$ ). Welch Two Sample t-test p-value: 0.1103. **c:** Comparison of rDNA copy number of probands with a more stringent IQ cutoff:  $I \leq 40$  ( $n = 210$ ) compared to  $I \geq 120$  ( $n = 112$ ). Welch Two Sample t-test p-value: 0.4129.

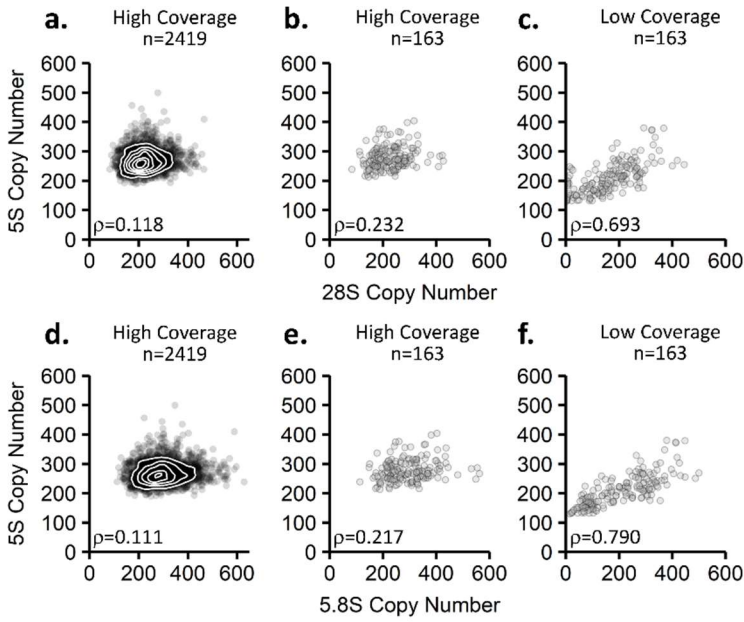

**Figure S2: Correlations of rDNA copy numbers in 1000 Genomes Project data.** A-C: Comparison of the 28S to 5S rDNA copy numbers in the (A) high-coverage 1000 Genomes Project data ( $n=2,419$ ), (B) subset of high-coverage 1000 Genomes Project data also analyzed in the low-coverage dataset ( $n=163$ ), and (C) low-coverage 1000 Genomes Project data ( $n=163$ ). Bottom: Comparison of the 5.8S to the 5S rDNA copy numbers in the (D) high-coverage 1000 Genomes Project data ( $n=2,419$ ), (E) subset of high-coverage 1000 Genomes Project data also analyzed in the low-coverage dataset ( $n=163$ ), and (F) low-coverage 1000 Genomes Project data ( $n=163$ ).

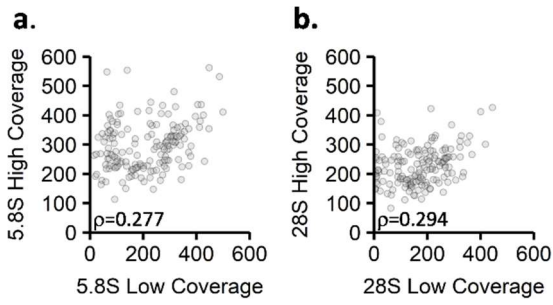

**Figure S3: Replicability of 5.8S and 28S rDNA copy number estimates between the high- and low-coverage 1000 Genomes Project data. a:** Comparison of 5.8S estimates between high- and low-coverage datasets (n=163). **b:** Comparison of 28S estimates between high- and low-coverage datasets (n=163).

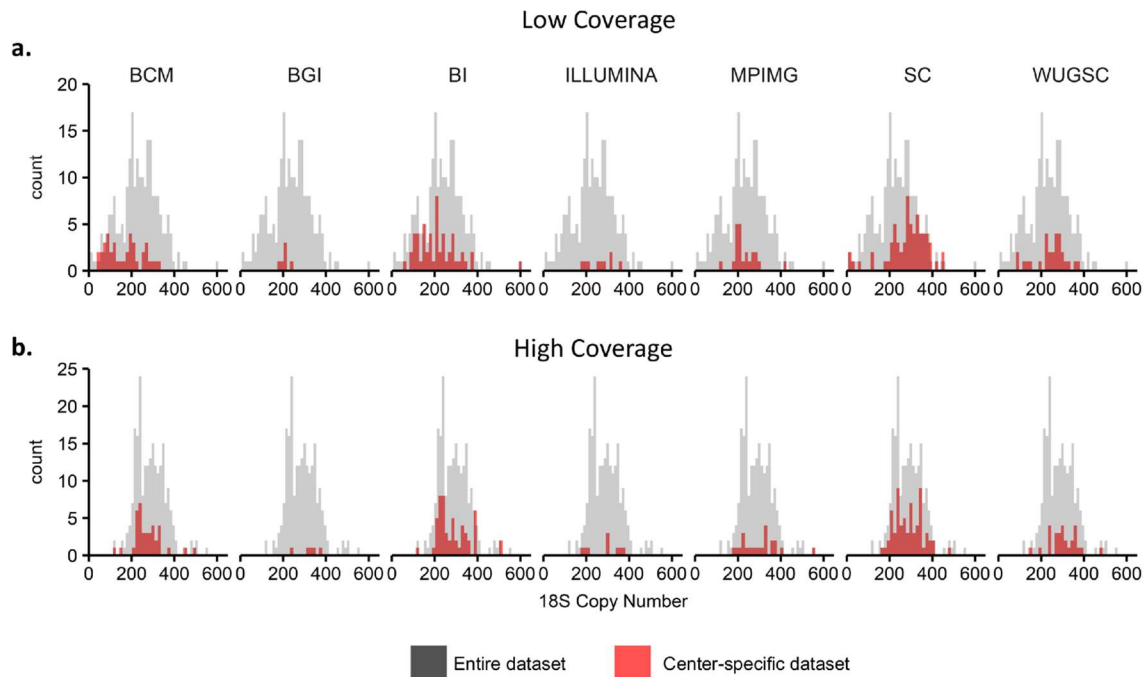

**Figure S4: Distribution of 18S copy number estimates by sequencing center.** **a:** Distribution of 18S copy number estimates from individual libraries sequenced by each of 7 sequencing centers (gray) for the 163 samples analyzed in the low coverage data (n=222 distinct libraries). Copy number estimates for samples produced by a given center in the low-coverage sequencing are highlighted in red. **b:** Distribution of 18S copy number estimates from the high-coverage 1000 Genomes Project data for the 163 samples analyzed in the low coverage data. The high-coverage data were not generated by any of these 7 centers: ‘b’ serves to demonstrate whether a center was assigned samples with a higher or lower copy number distribution. Samples that were composed of multiple distinct libraries in the low-coverage data are represented multiple times in the high-coverage plot.

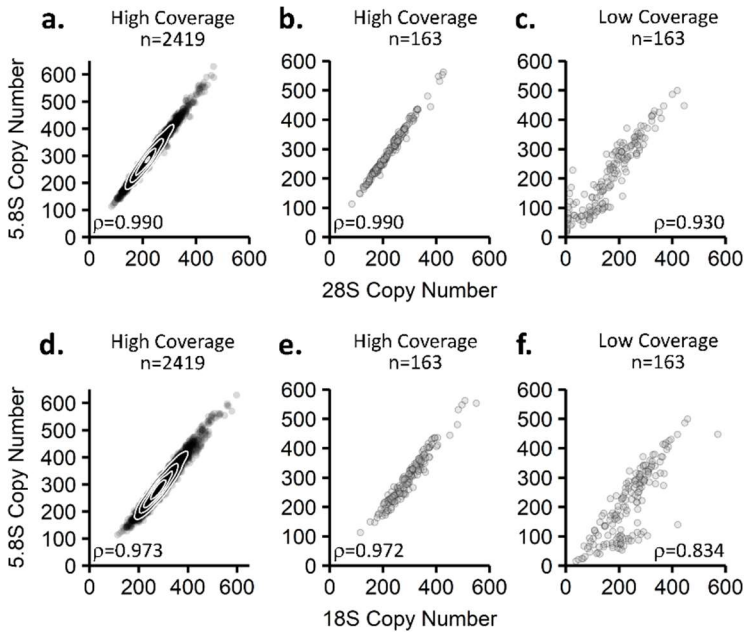

**Figure S5: Comparison of copy number estimates of regions of the 45S rDNA repeat to each other. a-c:** Comparison of the 28S to 5.8S rDNA copy numbers in the 1000 Genomes Project datasets. **a:** High-coverage 1000 Genomes Project data (n=2,419). **b:** Subset of high-coverage 1000 Genomes Project data also analyzed in the low-coverage dataset (n=163). **c:** Low-coverage 1000 Genomes Project data (n=163). **d-f:** Comparison of the 18S to the 5.8S rDNA copy numbers in the 1000 Genomes Project datasets. **d:** High-coverage 1000 Genomes Project data (n=2,419). **e:** Subset of high-coverage 1000 Genomes Project data also analyzed in the low-coverage dataset (n=163). **f:** Low-coverage 1000 Genomes Project data (n=163)

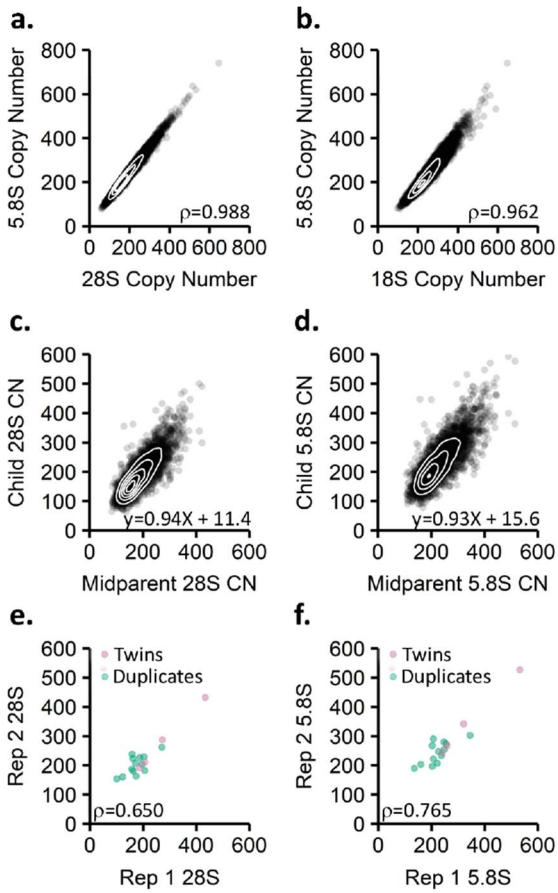

**Figure S6: Data quality metrics for the Simons Simplex Collection.** **a:** Comparison of the 28S to 5.8S rDNA copy numbers ( $n=7,210$ ). **b:** Comparison of the 18S to 5.8S rDNA copy numbers ( $n=7,210$ ). **c:** Heritability estimate of the 28S rDNA region ( $n=3,548$ ). **d:** Heritability estimate of the 5.8S rDNA region ( $n=3,548$ ). **e-f:** Comparison of 5.8S (**e**) and 28S (**f**) copy number estimates for either monozygotic twins ( $n=4$  pairs) or for individuals sequenced twice in the Simons Simplex Collection ( $n=13$ ). Spearman correlation indicated is for monozygotic twins and duplicates analyzed together.
